# Supplementary material for: Improved charge transport of Nb-doped TiO2nanorods in methylammonium lead iodide bromide perovskite solar cells
Source: Royal Society of Chemistry journal article supplement (doi:10.1039/c4ta02635g), 2014-01-01
Supplement: c4ta02635g1.pdf [file c4ta02635g1.pdf]

## Electronic Supplementary Information for

# Improved Charge Transport of Nb-Doped TiO<sub>2</sub> Nanorods in Methylammonium Lead Iodide Bromide Perovskite Solar Cell

Mengjin Yang,<sup>a</sup> Rui Guo,<sup>a</sup> Kamal Kadel,<sup>a</sup> Yunyan Liu,<sup>a,†</sup> Kevin O'Shea,<sup>b</sup> Richard Bone,<sup>a</sup> Xuewen Wang,<sup>a</sup> Jin He,<sup>a</sup> and Wenzhi Li,<sup>a,\*</sup>

<sup>a</sup> Department of Physics, Florida International University, Miami, FL 33199, United States

<sup>b</sup> Department of Chemistry and Biochemistry, Florida International University, Miami, FL, 33199, United States

\* Corresponding author: [wenzhi.li@fiu.edu](mailto:wenzhi.li@fiu.edu)

† Permanent address: Department of Optics Information Science and Technology, School of Sciences, Shandong University of Technology, Zibo, Shandong Province 255049, P.R. China,

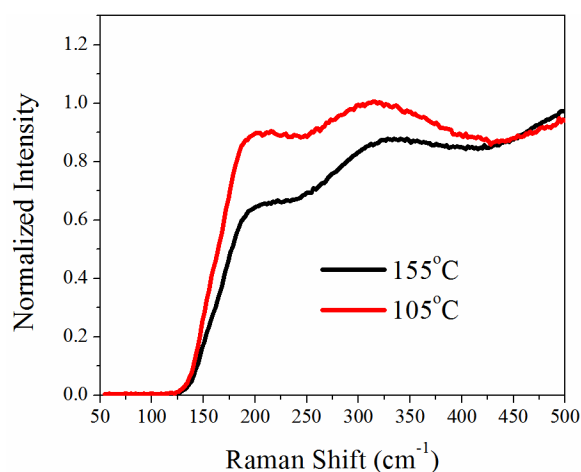

Figure S1. Raman spectra of perovskite baked at different temperatures, power used for 155°C baked sample is two orders higher than that of the sample baked at 105°C in order to obtain signals with good intensities.

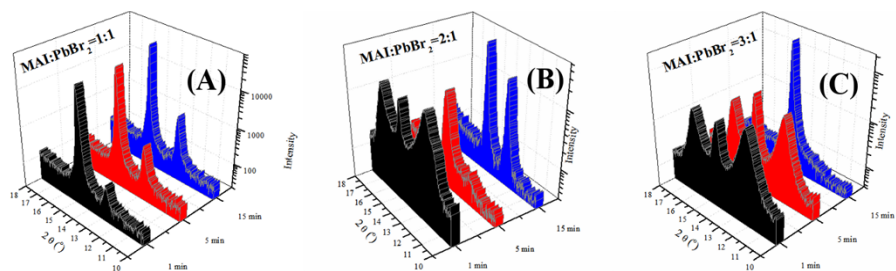

Figure S2. Evolution of XRD pattern for perovskite with different MAI:PbBr<sub>2</sub> ratios baked at 155°C at different times (1 min, 5 min, 15 min). (A) MAI:PbBr<sub>2</sub>=1:1, both the perovskite (~14°) and PbI<sub>2</sub> (12.6°) peaks emerges from the very beginning; (B) MAI:PbBr<sub>2</sub>=2:1, intermediate phase at the early time, perovskite peak only, and PbI<sub>2</sub> peak shows up at 15 min; (C) MAI:PbBr<sub>2</sub>=3:1, very long time of intermediate state, and only perovskite peak at 15 min.

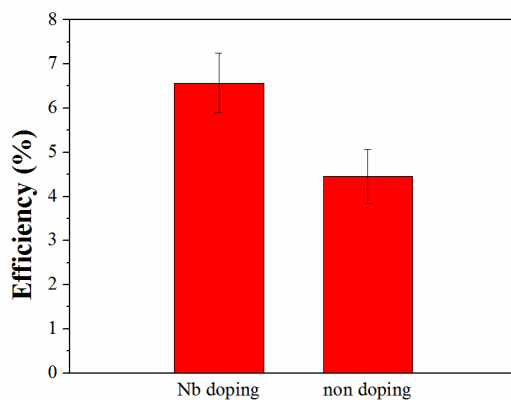

Figure S3. Average efficiency and standard deviation of devices made of 0.2% Nb-doped TiO<sub>2</sub> nanorods and nondoped TiO<sub>2</sub> nanorods (total sample number is eight).

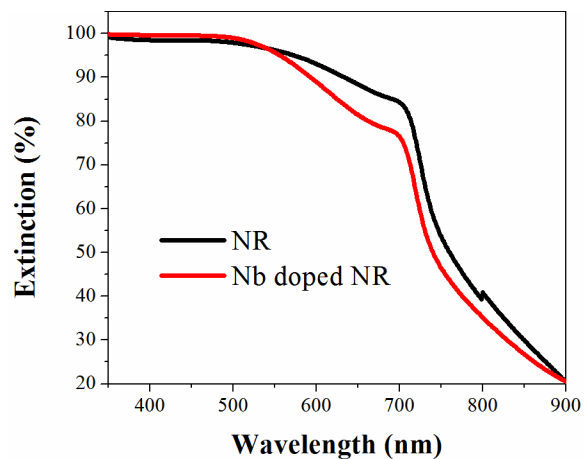

Figure S4. Extinction (including absorption and reflectance) spectra of perovskite films formed on NRs and Nb-doped NRs.

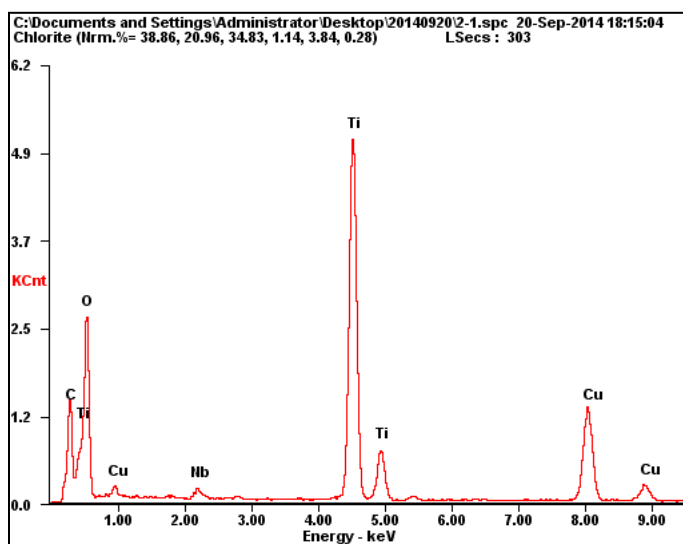

Figure S5. EDS of 1%Nb-doped nanorod. The EDS was taken using a JEM-2100F transmission electron microscope (TEM). The signal of Cu is from Cu grid used as the sample holder. Due to the low doping level of Nb in the 0.2% Nb-doped sample, the Nb is not detectable. To demonstrate the successful doping of Nb into the  $\text{TiO}_2$  nanorods, 1% Nb-doped sample was used for the TEM EDS experiment.
